# Supplementary material for: Proposing standardised geographical indicators of physical access to emergency obstetric and newborn care in low-income and middle-income countries
Source: PubMed Central journal article supplement (PMC6623986; doi:10.1136/bmjgh-2018-000778), 2019-07-01
Supplement: bmjgh-2018-000778supp001.pdf [file bmjgh-2018-000778supp001.pdf]

Table S1 Type, format, source and main limitations encountered for the data used in analysis presented in the paper

| Data (type, format)                                                                                                            | Burkina Faso                                                                                                               | Lao PDR                                                                           | Malawi                                                                          | Nigeria (Cross River State)                                                             | Main data limitations encountered during the study                              |
|--------------------------------------------------------------------------------------------------------------------------------|----------------------------------------------------------------------------------------------------------------------------|-----------------------------------------------------------------------------------|---------------------------------------------------------------------------------|-----------------------------------------------------------------------------------------|---------------------------------------------------------------------------------|
| Administrative division boundaries (geospatial, vector format)                                                                 | Geographic Institute of Burkina Faso through the SALB project [1]                                                          | Lao DECIDE Info online platform [2]                                               | Department of Survey of Malawi through the SALB project [1]                     | Office of the Surveyor General of the Federation (OSGOF) through the SALB project [1]   | Data quality (timeliness, accuracy)                                             |
| List and geographic coordinates of the EmONC facilities (geospatial, vector) as well as attribute data (tabular, excel format) | 2010 EmONC needs assessment [3]                                                                                            | Combination of different sources of information [4]                               | 2010 EmONC needs assessment [5] and Ministry of Health of Malawi                | 2012 Rapid Health Facility Assessment [6] and Nigeria MDG Information System (NMIS) [7] | Data availability; Data quality (accuracy, completeness)                        |
| Land cover distribution (geospatial, raster format)                                                                            | Global Mapping project [8] combined with the extent of urban areas from the Global Rural-Urban Mapping Project (GRUMP) [9] |                                                                                   |                                                                                 | Global Land Cover Dataset (GlobeLand30) [10]                                            | Data handling (reclassification)                                                |
| Road network (geospatial, vector format)                                                                                       | OpenStreetMap [11]                                                                                                         | Lao National Geographic Department (NGD)                                          | Department of Surveys of Malawi and the National Road Authority of Malawi       | OpenStreetMap [11]                                                                      | Data handling (cleaning, reclassification); Data completeness                   |
| Hydrographic network (geospatial, vector format)                                                                               | Global Insight plus [12]                                                                                                   | Lao National Geographic Department (NGD)                                          | Department of Surveys of Malawi                                                 | OpenStreetMap [11]                                                                      | Data accessibility (Proprietary); Data handling (cleaning); Data completeness   |
| Digital Elevation Model (DEM) (geospatial, raster format)                                                                      | 1 sqm Shuttle Radar Topography Mission (SRTM) dataset [13]                                                                 |                                                                                   | 90m SRTM dataset [13]                                                           |                                                                                         | None                                                                            |
| Target population distribution (Geospatial, raster format)                                                                     | 2008 Landscan database [14] adjusted to subnational number of births for 2010 [15]                                         | 2008 Landscan database [14] adjusted to subnational number of births for 2011 [4] | WorldPop [16] adjusted to subnational number of pregnant women for 2010 [17-18] |                                                                                         | Data availability (subnational level figures); Data accessibility (proprietary) |
| Maximum acceptable workload for skilled birth attendant (norm)                                                                 | WHO [19] adjusted to the local context [20]                                                                                | 2008-2012 Skilled Birth Attendance Development Plan [21]                          | Not applicable                                                                  | Not applicable                                                                          | Data availability and level of desegregation                                    |
| Service utilisation (tabular, Excel format)                                                                                    | 2010 Demographic Health Survey [15]                                                                                        | 2011-12 Lao Social Indicator Survey [22]                                          | Not applicable                                                                  | Not applicable                                                                          | Data availability and level of desegregation                                    |
| Travelling scenario (tabular, Excel format)                                                                                    | WHO [23] adjusted with local information [20]                                                                              | WHO [23] adjusted with local information [4]                                      | WHO [23] adjusted with local information [17]                                   | WHO [25] adjusted with local information [18]                                           | Data availability                                                               |

Table S1 Type, format, source and main limitations encountered for the data used in analysis presented in the paper

1 unsalb.org [Internet]. Second Administrative Level Boundaries (SALB) dataset web site [cited 2018 Jun 12]. Available from: <https://www.unsalb.org/>.

2 decide.la [Internet]. Lao DECIDE Info online platform [cited 2018 Jun 12]. Available from: <http://www.decide.la>.

3 Centre Nationale de la Recherche Scientifique et Technologique. Evaluation des Besoins en Soins Obstétricaux et Néonataux d'Urgence, couplée à la cartographie de l'offre de soins en Santé de la Reproduction au Burkina Faso. Ministère de la Recherche Scientifique et de l'Innovation, 2011.

4 World Health Organization. Investing the Marginal Dollar for Maternal and Newborn Health: Geographic Accessibility Analysis for Emergency Obstetric Care services in Laos. WHO Report 2016 [cited 2018 Jun 12]. Available from: <http://apps.who.int/iris/bitstream/10665/250273/1/WHO-HIS-HGF-GIS-2016.4-eng.pdf>.

5 Malawi Ministry of Health: Malawi 2010 EmONC Needs Assessment. Final Report, Lilongwe, Feb 2011.

6 Cross River State Ministry of Health and FHI 360. 2013. Cross River State-wide Rapid Health Facility Assessment, Nigeria: Cross River State Ministry of Health and FHI 360. Final report 2013 [cited 2018 Jun 12]. Available from: <https://www.fhi360.org/sites/default/files/media/documents/Cross%20River%20RHFA%20report.pdf>.

7 Center for Sustainable development, Nigeria MDG Information System: (NMIS) Takes Open Data Further. Earth Institute, Columbia University. 2014 March 10 [cited 2018 Jun 12]. Available from: <http://csd.columbia.edu/2014/03/10/the-nigeria-mdg-information-system-nmis-takes-open-data-further/>.

8 <https://globalmaps.github.io/> [Internet]. Global Map data archives [cited 2018 Jun 12]. Available from: <https://globalmaps.github.io/>.

9 Center for International Earth Science Information Network (CIESIN)/Columbia University, International Food Policy Research Institute (IFPRI), The World Bank, and Centro Internacional de Agricultura Tropical (CIAT). 2011 [cited 2018 Jun 12]. Global Rural-Urban Mapping Project, Version 1 (GRUMPv1): Urban Extents Grid. Palisades, NY: NASA Socioeconomic Data and Applications Center (SEDAC). Available from: <http://sedac.ciesin.columbia.edu/data/set/grump-v1-urban-extents>.

10 Global Land Cover Dataset (GLOBELAND30) [Internet]. [cited 2018 Jun 12]. Available from <http://www.globeland30.org/GLC30Download/index.aspx> .

11 OpenStreetMap [Internet]. [cited 2018 Jun 12]. Available from <http://www.openstreetmap.org/>.

12 Global insight plus [Internet]. Europa Technologies [cited 2018 Jun 12]. Available from <https://www.europa.uk.com/map-data/global-map-data/global-insight-plus/>.

13 Shuttle Radar Topography Mission [Internet]. Jet Propulsion Laboratory, California Institute of Technology Data Products: SRTM C-Band Data Products [cited 2018 Jun 12]. Available from: <http://www2.jpl.nasa.gov/srtm/cbanddataproducs.html>.

14 LandScan: Geographic Information Science and Technology [Internet]. Oak Ridge National Laboratory [cited 2018 Jun 12]. Available from: <http://web.ornl.gov/sci/landscan/>.

15 Institut National de la Statistique et de la Démographie (INSD) et ICF International. Enquête Démographique et de Santé et à Indicateurs Multiples du Burkina Faso 2010. Calverton, Maryland, USA : INSD et ICF International 2012 [cited 2018 Jun 12]. Available from: <https://www.dhsprogram.com/pubs/pdf/FR256/FR256.pdf>.

16 WorldPop [Internet]. [cited 2018 Jun 12]. Available from: <http://www.worldpop.org.uk/>.

17 USAID. Malawi - Accessibility to EmOC facilities. USAID report 2015 [cited 2018 Jun 12]. Available from: [http://www.healthgeolab.net/PUB/USAID\\_MWI\\_2015.pdf](http://www.healthgeolab.net/PUB/USAID_MWI_2015.pdf)

18 USAID. Nigeria - Accessibility to EmOC facilities in the State of Cross River. USAID report 2016 [cited 2018 Jun 12]. Available from: [https://pdf.usaid.gov/pdf\\_docs/pa00mdwb.pdf](https://pdf.usaid.gov/pdf_docs/pa00mdwb.pdf) .

19 World Health Organization. The World Health Report 2005 - make every mother and child count. Geneva, 2005 [cited 2018 Jun 12]. Available from: <http://www.who.int/whr/2005/en/>.

20 World Health Organization. Investing the Marginal Dollar for Maternal and Newborn Health: Geographic Accessibility Analysis for Emergency Obstetric Care services in Burkina Faso. WHO Report 2016 [cited 2018 Jun 12]. Available from: <http://apps.who.int/iris/bitstream/10665/250269/1/WHO-HIS-HGF-GIS-2016.1-eng.pdf>.

21 Lao People's Democratic Republic Ministry of Health (2009): Skilled Birth Attendance Development plan Lao PDR 2008-2012

22 Ministry of Health/Lao PDR and Lao Statistics Bureau. 2012. Lao Social Indicator Survey 2011-12. Multiple Indicator Cluster Survey/Demographic and Health Survey. Vientiane, 2012 Dec [cited 2018 Jun 12]. Available from: <https://dhsprogram.com/pubs/pdf/fr268/fr268.pdf>.

23 World Health Organization. Global status report on road safety: time for action. Geneva, 2009 [cited 2018 Jun 12]. Available from: [http://www.who.int/violence\\_injury\\_prevention/road\\_safety\\_status/2009/en/](http://www.who.int/violence_injury_prevention/road_safety_status/2009/en/).

25 World Health Organization. Global status report on road safety 2013: Supporting a decade of action. Geneva, 2013 [cited 2018 Jun 12]. Available from: [http://www.who.int/violence\\_injury\\_prevention/road\\_safety\\_status/2013/en/](http://www.who.int/violence_injury_prevention/road_safety_status/2013/en/).
